# Supplementary material for: Incorporating knowledge of disease-defining hub genes and regulatory network into a machine learning-based model for predicting treatment response in lupus nephritis after the first renal flare
Source: Springer Nature journal article supplement (doi:10.1186/s12967-023-03931-z), 2023-02-03
Supplement: MOESM1 [file 23989656]

Table S1. Details of datasets used.

| Study     | Array name                                                  | Platform | N   | Patient | Control                          | Tissue Type     | Purpose                |
|-----------|-------------------------------------------------------------|----------|-----|---------|----------------------------------|-----------------|------------------------|
| GSE32591  | Affy_HGU133A_CDF<br>_ENTREZG_10                             | GPL14663 | 93  | 64      | 29                               | Renal<br>biopsy | Discovery              |
| GSE112943 | Illumina HumanHT-12<br>V4.0 expression<br>beadchip          | GPL10558 | 21  | 14      | 7                                | Renal<br>biopsy | Discovery              |
| GSE81622  | Illumina HumanHT-12<br>V4.0 expression<br>beadchip          | GPL10558 | 40  | 15      | 25                               | Blood           | Validation             |
| GSE99967  | Affymetrix Human<br>Gene 2.0 ST Array                       | GPL21970 | 46  | 29      | 17                               | Blood           | Validation             |
| GSE72326  | Illumina HumanHT-12<br>V4.0 expression<br>beadchip          | GPL10558 | 178 | 157     | 21                               | Blood           | Validation             |
| GSE60861  | Agilent-026652 Whole<br>Human Genome<br>Microarray 4x44K v2 | GPL13497 | 65  | 11      | 54 (Other<br>kidney<br>diseases) | Renal<br>biopsy | Validation             |
| GSE69438  | Affymetrix Human<br>Genome U133 Plus<br>2.0 Array           | GPL11670 | 37  | 16      | 21 (Other<br>kidney<br>diseases) | Renal<br>biopsy | Validation             |
| GSE200306 | nCounter NanoString<br>Human Immunology<br>v2               | GPL21847 | 68  | 58      | 10                               | Renal<br>biopsy | Model<br>construction  |
| GSE113342 | nCounter NanoString<br>Human Immunology<br>v2               | GPL21847 | 44  | 28      | 16                               | Renal<br>biopsy | Validation of<br>model |
| Total     |                                                             |          | 592 | 392     | 200                              |                 |                        |

Table S2. Gene sets for each DDC.

|       |                                                                                                                                                                                                                                                                                                                                                                                                                                                                                                                                                                                                                                                                                 |
|-------|---------------------------------------------------------------------------------------------------------------------------------------------------------------------------------------------------------------------------------------------------------------------------------------------------------------------------------------------------------------------------------------------------------------------------------------------------------------------------------------------------------------------------------------------------------------------------------------------------------------------------------------------------------------------------------|
| DDC-1 | MX1, STAT1, IFIT2, IFI16, GBP1, SERPING1, TNFSF10, CXCL10, IFI35, IFITM1, IFIH1, TAP1, IRF7, C1QB, HLA-B, PSMB8, CD163, CCL8, MYD88                                                                                                                                                                                                                                                                                                                                                                                                                                                                                                                                             |
| DDC-2 | HLA-C, CASP3, HLA-DQB1, C1R, VCAM1, BLNK, ITGAM, MSR1, LILRA5, TNFSF15, IRF1, FCGR2B, CXCL1, CASP8, TNFRSF1B, ATG12, S1PR1, C1QBP, TLR8, SLAMF7, ICAM1, HLA-A, TLR1, PYCARD, BST2, LAMP3, CD24, CD55, BCAP31, CD59, EDNRB, CHUK, HFE, KLRK1, ATM, UBE2L3, HRAS                                                                                                                                                                                                                                                                                                                                                                                                                  |
| DDC-3 | CCRL2, PML, LILRB4, CD83, BTK, NLRP3, PDGFB, TNFSF12, CEACAM8, RELB, CLEC4E, PTPN22, IL1RAP, LILRB5, RAG1, CXCL2, TCF7, IFNB1, IL22, EGR1, LTBR, SRC, TNFSF8, CEACAM6, FOXP3, BCL2, GFI1, TOLLIP, MASP1, CD1A, TGFB1, LILRA4, TAL1, FCAR, KIR3DL3, STAT5A, ZBTB16, TNFRSF8, IKZF2, CUL9, PLA2G2E, NCAM1, IRF3, SMAD3, IL11RA, CD160                                                                                                                                                                                                                                                                                                                                             |
| DDC-4 | STAT2, NFIL3, CISH, CTSG, IRF4, BCL3, RELA, KLRC4, MAPKAPK2, MIF, MME, SLC2A1, ITGB1, CD22, CXCR3, NFKBIA, BCL2L11, XCL1, NFATC3, IL6R, TNFSF11, IL1RL2, CD8B, XCR1, IL26, AIRE, TRAF3, IL5, CDKN1A, CCL22, TNFRSF10C, CIITA, CD70, SOCS3, ARG1, CASP10, LTB4R, CRADD, TGFB1, NFKB2, MAPK11, MAP4K1, ICAM4, IL21, ICAM5, RORC, IL23A, IL2RA, CSF1, CD3E, B3GAT1, CD6, CAMP, BST1, IL3, JAK3, LILRB3, LTA, CCL16, C8B, POU2F2, C8A, CSF2, TRAF4, VTN, C6, C4BPA, C8G, NFATC1, ITGA2B, IL13, ICOSLG, PAX5, MASP2, ARG2, DEFB1, IFNG, CD28, TNFRSF9, IL12B, RAG2, PRDM1, LIF, IL18RAP, IL2, NOS2, IL1A, DPP4, CD82, NOD1, FKBP5, IFNA2, CR1, TNFSF4, KIR3DL1, PLA2G2A, IL4, CD40LG |
| DDC-5 | IL1RN, IL18R1, IL2RG, CMKLR1, BATF3, PSMB5, IRF5, CD209, PDGFRB, ICOS, IL4R, CCL13, CD4, ETS1, SLAMF1, CCR6, CARD9, IKZF1, CXCR6, LILRA2, PLAUR, IL1B, LILRB1, TRAF6, CFP, CD80, TNF, ITGAX, IL21R, STAT6, TYK2, ITGA5, PRKCD, TRAF2, LILRA1, NOTCH1, PTAFR, MAP4K2, CCL18, IKBKE, BATF, SELE, IL1RL1, TNFRSF4, IRAK3, DUSP4, PSMB7, CD8A, CCR10, CD19, CD79B, CCL4, MARCO, ITGAL, IL16, TBX21, ZAP70, SELPLG, GNLY, IL2RB, TRAF1                                                                                                                                                                                                                                               |
| DDC-6 | IL13RA1, CD81, SPP1, IL32, CXCL12, C3, CFH, HLA-DQA1, MALT1, CD3D, NT5E, CCL5, CCND3, BCL10, IRAK4, CCL20, THY1, GPR183, TP53, CD9, CTSC, ICAM3, GZMK, LCK, MAPK1, PDCD2, IGF2R, PRF1, TNFRSF14, STAT4, IL7R, MBP, CFI, NOTCH2, TRAF5, IKZF3, CCL11, CCL15, CLU, SMAD5, CD247, KIT, KLRF1, CCL19, RAF1, PIGR, C7, ILF3, HLA-DOB, GPI, MUC1, CD46, CASP2, C5, CCR7, MAF, STAT5B, ITGAE, SIGIRR, IL12RB1, FYN, PTGER4, ABCB1                                                                                                                                                                                                                                                      |
| DDC-7 | CCL2, CEACAM1, S100A9, LTF, TLR4, SELL, FAS, MR1, NOD2, TAP2, C2, CLEC4A, ITGA4, NCF4, SYK, BCL6, CD58, CXCL11, PTPN6, LILRB2, TICAM1, CCR2, TAPBP, IL18, IL1R2, C1S, XBP1, TLR7, JAK2, S100A8, TNFRSF17, STAT3, IL15, MAPK14, PTK2, CXCR4, KCNJ2, IRAK1, ITGA6, NFKB1, ABL1, CXCL9, IL1R1, PTGS2, FCGRT, TNFAIP3, CX3CL1, TLR5, CD164, PTPN2, ATG7, CEBPB, PLAU,                                                                                                                                                                                                                                                                                                               |

|       |                                                                                                                                                                                                                                                                                                                                                                                                                                                                    |
|-------|--------------------------------------------------------------------------------------------------------------------------------------------------------------------------------------------------------------------------------------------------------------------------------------------------------------------------------------------------------------------------------------------------------------------------------------------------------------------|
|       | SOCS1, MCL1, CTNNB1                                                                                                                                                                                                                                                                                                                                                                                                                                                |
| DDC-8 | C1QA, CASP1, HLA-DRB1, PSMB9, CD14, FCER1G, TLR2, CD53, TBK1, ZEB1, TCF4, LCP2, PSMC2, CFD, ITGB2, HLA-DRA, B2M, CTSS, ARHGDIB, PECAM1, HLA-DMB, HLA-DPA1, CFB, IL6ST, IL7, PSMB10, TLR3, CD74, ATG5, HLA-DMA, CSF1R, ICAM2, TGFBI, CD48, IL10RA, HLA-DPB1, MAP4K4, CX3CR1, FADD, LITAF, GZMB, TGFBR2, ENTPD1, BID, CD86, LAIR1, IFNAR2, AHR, CLEC7A, CD40, CD34, FN1, IFNAR1, CDH5, APP, IRF8, CD44, IDO1, ADA, PSMD7, CD36, BAX, PPARG, CCR5, GATA3, IKBKB, GZMA |

DDC: Disease-defining cluster

Table S3. Model performance based on each DDC.

| DDC   | Training set AUC (95% CI) | Testing set AUC (95% CI) | Entire set AUC (95% CI) |
|-------|---------------------------|--------------------------|-------------------------|
| DDC-1 | 1.0 (1.00-1.00)           | 0.61 (0.39-1.00)         | 0.91 (0.82-1.00)        |
| DDC-2 | 1.0 (1.00-1.00)           | 0.61 (0.10-0.81)         | 0.97 (0.86-1.00)        |
| DDC-3 | 1.0 (1.00-1.00)           | 0.65 (0.10-0.83)         | 0.93 (0.84-1.00)        |
| DDC-4 | 1.0 (1.00-1.00)           | 0.69 (0.48-1.00)         | 0.94 (0.84-1.00)        |
| DDC-5 | 1.0 (1.00-1.00)           | 0.71 (0.10-0.89)         | 0.96 (0.85-1.00)        |
| DDC-6 | 1.0 (1.00-1.00)           | 0.75 (0.44-1.00)         | 0.95 (0.88-1.00)        |
| DDC-7 | 1.0 (1.00-1.00)           | 0.64 (0.10-0.82)         | 0.95 (0.88-1.00)        |
| DDC-8 | 1.0 (1.00-1.00)           | 0.60 (0.10-0.79)         | 0.90 (0.81-1.00)        |

DDC: Disease-defining cluster

Table S4. Prediction performance validated in GSE113342.

| DDC   | Precision | Recall | F1 score |
|-------|-----------|--------|----------|
| DDC-1 | 0.6       | 0.21   | 0.31     |
| DDC-2 | 0.64      | 0.53   | 0.58     |
| DDC-3 | 0.64      | 0.58   | 0.61     |
| DDC-4 | 0.89      | 0.53   | 0.66     |
| DDC-5 | 0.55      | 0.55   | 0.55     |
| DDC-6 | 0.83      | 0.71   | 0.77     |
| DDC-7 | 0.5       | 0.13   | 0.41     |
| DDC-8 | 0.6       | 0.21   | 0.31     |

DDC: Disease-defining cluster
