# Supplementary material for: Incorporating knowledge of disease-defining hub genes and regulatory network into a machine learning-based model for predicting treatment response in lupus nephritis after the first renal flare
Source: Springer Nature journal article supplement (doi:10.1186/s12967-023-03931-z), 2023-02-03
Supplement: MOESM2 [file 23989656]

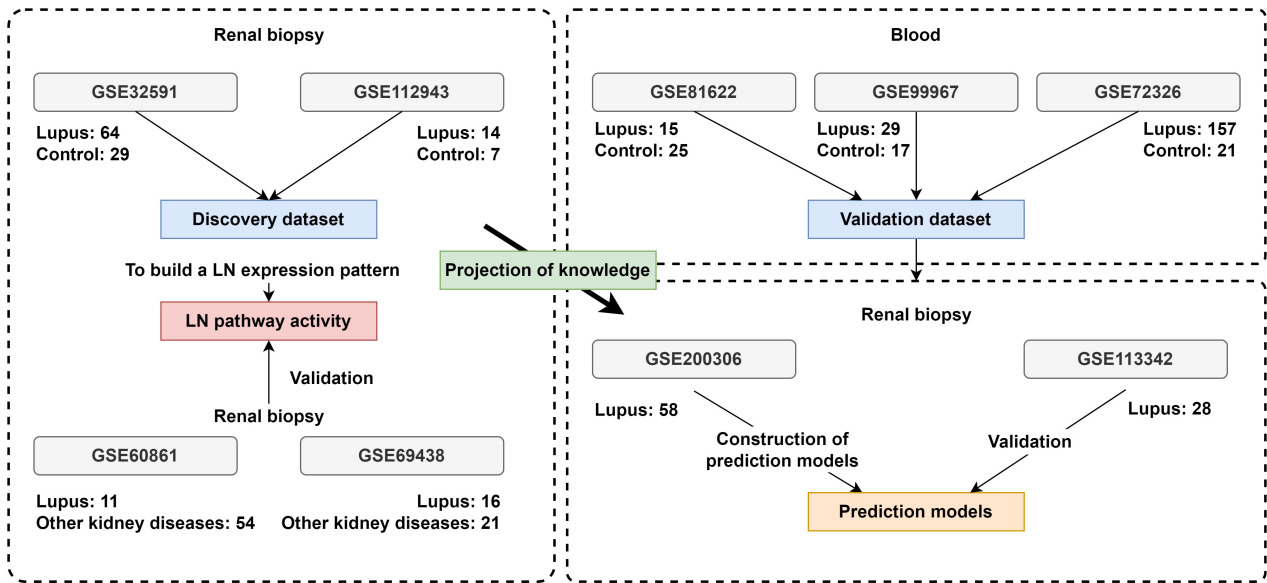

**Figure S1. Diagram of study design.**

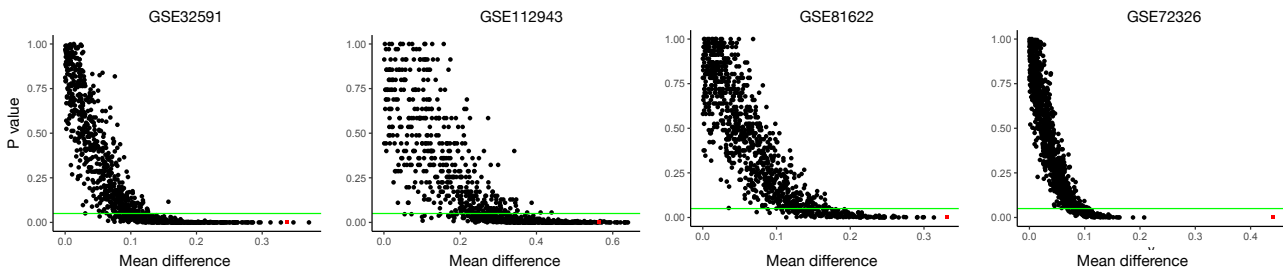

**Figure S2. Permutation test to confirm the validity of the hub genes in LN.** Scatter plots show ssGSEA scores calculated from 1000 random selection of 45 genes. Each data point in the plot indicates data for a randomly generated gene set. The red point highlighted is calculated from the hub gene in our study. x-axis is absolute mean difference =  $|\text{mean}(\text{ssGSEA-LN}) - \text{mean}(\text{ssGSEA-control})|$  and y-axis is P-value estimated by Wilcoxon's rank sum test of ssGSEA score between LN and control (green lines represent P-value = 0.05).

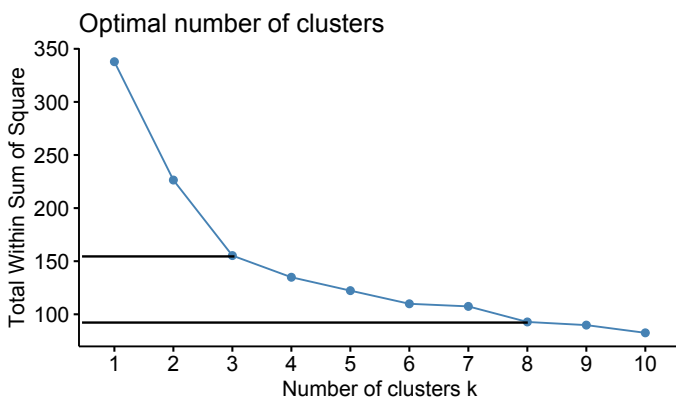

**Figure S3. Elbow plot of K-means clustering.** Horizontal lines indicate the first and second elbow.
